# Supplementary material for: Engineering a Novel Probiotic Toolkit in Escherichia coliNissle 1917 for Sensing and Mitigating Gut Inflammatory Diseases
Source: PubMed Central journal article supplement (PMC11334186; doi:10.1021/acssynbio.4c00036), 2024-08-08
Supplement: sb4c00036_si_001.pdf [file sb4c00036_si_001.pdf]

1 **Supporting information**

2  
3  
4 **Engineering a novel probiotic toolkit in *Escherichia coli* Nissle1917 for sensing and**  
5 **mitigating gut inflammatory diseases**

6  
7 **Authors**

8 Nathalie Weibel<sup>1, †</sup>, Martina Curcio<sup>1, †</sup>, Atilla Schreiber<sup>1, †</sup>, Gabriel Arriaga<sup>1, †</sup>, Marine Mausy<sup>1</sup>  
9 †, Jana Mehdy<sup>1</sup>, Lea Brüllmann<sup>1</sup>, Andreas Meyer<sup>1</sup>, Len Roth<sup>1</sup>, Tamara Flury<sup>1</sup>, Valerie Pecina<sup>1</sup>,  
10 Kim Starlinger<sup>1</sup>, Jan DERNIČ<sup>2</sup>, Kenny Jungfer<sup>3</sup>, Fabian Ackle<sup>4</sup>, Jennifer Earp<sup>4</sup>, Martin  
11 Hausmann<sup>5</sup>, Martin Jinek<sup>3</sup>, Gerhard Rogler<sup>5</sup>, Cauã Antunes Westmann<sup>6,7\*</sup>

12  
13 **Affiliation**

14 <sup>1</sup> – Universität Zürich, Campus Irchel, Winterthurerstrasse 190, 8057 Zürich

15 <sup>2</sup> – Institute of Pharmacology and Toxicology, University of Zurich, Winterthurerstrasse 190,  
16 CH-8057 Zurich, Switzerland

17 <sup>3</sup> – Department of Biochemistry, University of Zurich, Winterthurerstrasse 190, CH-8057,  
18 Zurich, Switzerland

19 <sup>4</sup> – Institute of Medical Microbiology, University of Zürich, Gloriastrasse 28/30, CH-8006  
20 Zürich, Switzerland

21 <sup>5</sup> - Department of Gastroenterology and Hepatology, University Hospital Zurich and Zurich  
22 University, Rämistrasse 100, 8091, Zurich, Switzerland

23 <sup>6</sup> – Department of Evolutionary Biology and Environmental Studies, University of Zurich,  
24 Winterthurerstrasse 190, Zurich CH-8057, Switzerland

25 <sup>7</sup> – Swiss Institute of Bioinformatics, Quartier Sorge-Batiment Genopode, 1015 Lausanne,  
26 Switzerland

27 † - Equal contribution

28 \* - Corresponding author [caua.westmann@ieu.uzh.ch](mailto:caua.westmann@ieu.uzh.ch)

29

30

|    |                                                                                                                      |
|----|----------------------------------------------------------------------------------------------------------------------|
| 31 | <b>INDEX</b>                                                                                                         |
| 32 |                                                                                                                      |
| 33 | <b>1. General Methods</b>                                                                                            |
| 34 | <b>1.1. PCR</b>                                                                                                      |
| 35 | <b>1.2. Real time quantitative PCR</b>                                                                               |
| 36 | <b>1.3. Preparation of Calcium competent EcN</b>                                                                     |
| 37 | <b>1.4. Heat-shock transformation of calcium competent EcN</b>                                                       |
| 38 | <b>1.5. Gibson assembly</b>                                                                                          |
| 39 | <b>1.6. Preparation of electrocompetent EcN</b>                                                                      |
| 40 | <b>1.7. Electroporation</b>                                                                                          |
| 41 | <b>1.8. Western Blot</b>                                                                                             |
| 42 |                                                                                                                      |
| 43 | <b>2. Plasmid design and construction</b>                                                                            |
| 44 | <b>2.1. Secretion plasmid design</b>                                                                                 |
| 45 | <b>2.2. NO-sensing plasmids design</b>                                                                               |
| 46 | <b>2.3. Plasmid cloning</b>                                                                                          |
| 47 |                                                                                                                      |
| 48 | <b>3. Model supplementary methods</b>                                                                                |
| 49 | <b>3.1. Assumptions and parameters</b>                                                                               |
| 50 | <b>3.2. Number of inflammatory sites</b>                                                                             |
| 51 | <b>3.3. Number of bacteria</b>                                                                                       |
| 52 | <b>3.4. Emission coefficients</b>                                                                                    |
| 53 | <b>3.5. Diffusion Coefficients</b>                                                                                   |
| 54 | <b>3.6. Emission Dynamics</b>                                                                                        |
| 55 | <b>3.7. Diffusion Dynamics</b>                                                                                       |
| 56 |                                                                                                                      |
| 57 | <b>4. Supplementary Tables</b>                                                                                       |
| 58 | <b>4.1. Table S1. List of oligos used in this study</b>                                                              |
| 59 |                                                                                                                      |
| 60 | <b>5. Supplementary Figures</b>                                                                                      |
| 61 | <b>5.1. Supplementary figure S1. Plasmid map of the negative control</b>                                             |
| 62 | <b>5.2. Supplementary figure S2. Plasmid map of the engineered nitric oxide sensor piGEM2</b>                        |
| 63 | ( $\beta$ -1)                                                                                                        |
| 64 | <b>5.3. Supplementary figure S3. Plasmid map of the engineered nitric oxide sensor construct</b>                     |
| 65 | piGEM3 (WT)                                                                                                          |
| 66 | <b>5.4. Supplementary figure S4. DETA/NO has little effect on cellular growth</b>                                    |
| 67 | <b>5.5. Supplementary figure S5. The removal of the plasmid-expressed NorR reduces</b>                               |
| 68 | sensitivity and response strength to NO                                                                              |
| 69 | <b>5.6. Supplementary figure S6. Plasmid map of the nanobody purification plasmid</b>                                |
| 70 | <b>5.7. Supplementary figure S7. Plasmid map of the arabinose-induced nanobody expression</b>                        |
| 71 | plasmid                                                                                                              |
| 72 | <b>5.8. Supplementary figure S8. Purification of monovalent and bivalent anti-TNF<math>\alpha</math></b>             |
| 73 | nanobodies from <i>E. coli MC1061</i>                                                                                |
| 74 | <b>5.9. Supplementary figure S9. Comparison of over day to overnight arabinose-induced</b>                           |
| 75 | nanobody secretion in <i>E. coli MC1061</i>                                                                          |
| 76 | <b>5.10. Supplementary figure S10. Comparison of TNF<math>\alpha</math> binding capacity between</b>                 |
| 77 | monovalent and bivalent nanobodies                                                                                   |
| 78 | <b>5.11. Supplementary figure S11. Plasmid map of the secretion system plasmid</b>                                   |
| 79 | <b>5.12. Supplementary figure S12. Arabinose-induced anti-TNF<math>\alpha</math> nanobody secretion in <i>E.</i></b> |
| 80 | <i>coli MC1061</i>                                                                                                   |

- 81 **5.13. Supplementary figure S13.** Arabinose-induced anti-TNF $\alpha$  nanobody secretion in *E.*  
82 *coli Nissle 1917*
- 83 **5.14. Supplementary figure S14.** Analysis of ELISA comparing the binding capabilities of  
84 purified and secreted monovalent and bivalent anti-TNF $\alpha$  nanobodies in *E. coli Nissle*  
85 *1917* and *E. coli MC1061*
- 86 **5.15. Supplementary figure S15.** Plasmid map of the NO-induced nanobody expression  
87 system ( $\beta$ -2)
- 88 **5.16. Supplementary figure S16.** NO-induced monovalent anti-TNF $\alpha$  nanobody secretion  
89 and function in *E. coli Nissle 1917*
- 90 **5.17. Supplementary figure S17.** Visual comparison between diffusion models
- 91
- 92 **6. References**

93 **1. General Methods**

94

95 **1.1. PCR**

96 To amplify inserts, PCR was performed with Phusion Hotstart polymerase. Amounts of  
97 reactants for one aliquot: 31  $\mu\text{L}$  ddH<sub>2</sub>O, 10  $\mu\text{L}$  Hi-Fi Phusion buffer (5x), 2.5  $\mu\text{L}$  of each,  
98 forward and reverse primer (10  $\mu\text{M}$ ), 1  $\mu\text{L}$  DMSO, 1  $\mu\text{L}$  MgCl<sub>2</sub> (50 mM), 1  $\mu\text{L}$  dNTP (10  
99 mM), 0.5  $\mu\text{L}$  of template (1  $\mu\text{L}$  for low-concentrated templates), 0.5  $\mu\text{L}$  Phusion polymerase.  
100 We performed PCR with the following program: 98 °C/3 min; 25 cycles of 98 °C/30 s, 50 °C/30  
101 s, 72 °C/0.5 min/kb; 72 °C/10 min. Following PCR, the fragments were separated by  
102 electrophoresis on a 1% agarose-gel and subsequent gel extraction.

103

104 **1.2. Real time quantitative PCR**

105 The frozen cell pellets were thawed and lysed in order to isolate the RNA using Maxwell RCS  
106 (promega) according to the company's protocol. Then reverse transcription was performed  
107 using the TaqMan™ Reverse Transcription Reagents kit (Thermo Fisher N8080234) to obtain  
108 the cDNA of the transcriptome of the cells. Reverse transcription was performed in a  
109 thermocycler and kept at 4°C until further processed. The obtained cDNA was diluted to  
110 25ng/ $\mu\text{l}$  and prepared for the qPCR. ABI Fast Polymerase mix (Applied Biosystems) was used  
111 and primers for IL-1 $\beta$  (gene of interest) were added together with primers for GAP-DH serving  
112 as the house-keeping gene. Samples were pipetted as triplicates in a 384-well plate and qPCR  
113 analysis was performed with the QuantStudio 6 Real-Time PCR system (Thermo Fisher  
114 Scientific).

115

116

117

118 **1.3. Preparation of calcium competent EcN**

119 *E.Coli Nissle 1917* bacteria were obtained from Mutaflor® (Herdecke, Germany) and cultured  
120 overnight in LB medium at 37°C, 220 rpm. This original culture was diluted 1:10 and 1:100  
121 on the following day and 100 µL of each dilution were plated on agar-plates (overnight, 37°C,  
122 220 rpm). Competent bacteria were made from a single colony from one of the plates (where  
123 easier to pick one) following an in-house established protocol.

124

125 **1.4. Heat-shock transformation of calcium competent EcN**

126 10-100 ng of the vector were added to ice-cold 50 µL aliquots of chemically competent cells  
127 and incubated on ice for 30 min/5 min for miniprep plasmids. Following this, cells were  
128 heat-shocked for 45-50 s at 42°C and placed back on ice for 5 min. 350 µL LB medium was  
129 added and tubes were incubated at 37°C, 200-300 rpm for 1h/15 min for miniprep plasmids.  
130 Tubes were then spun down for 5 min at 3000g, the supernatant poured away and the pellet  
131 resuspended in the remaining liquid. (This step can be skipped for miniprep plasmids.)  
132 From the transformed bacteria, up to 50 µL were plated on small ampicillin-supplemented agar  
133 plates (1:1000) and cultivated at 37°C, 220 rpm.

134

135 **1.5. Gibson assembly**

136 First, an in-house Gibson Master Mix was prepared and stored in 15 µL aliquots at -20°C.  
137 Formula for a 1.2 mL Master Mix: 320 µL ISO buffer (5x), 699 µL ddH<sub>2</sub>O, 160 µL Taq ligase  
138 (40U/µL), 20 µL Phusion polymerase (2U/µL), 0.64 µL T5 exonuclease (10U/µL). The  
139 linearized backbone and fragments were mixed in a 1:2 ratio into a final volume of 5 µL. This  
140 was then added to one aliquot of Gibson Master Mix and incubated for 1h at 50°C. For  
141 transforming bacteria with a Gibson assembled product, aliquoted chemically competent cells  
142 were thawed on ice for 10 min, then mixed with 5 µL of the freshly made Gibson mix and

143 incubated on ice for 1h. Following this, cells were heat-shocked for 45 sec at 42°C, then placed  
144 back on ice for 3 min. 0.5 mL LB medium was added and tubes were incubated for 1h at 37°C,  
145 600 rpm. From the transformed bacteria, 100 µL were plated on small agar plates,  
146 supplemented with ampicillin (1:1000), and cultivated at 37°C, 220 rpm.

147

#### 148 **1.6. Preparation of electrocompetent EcN**

149 All tubes and pipettes were prechilled at 4°C or -80°C as appropriate. (Additionally, all flasks  
150 were rinsed with H<sub>2</sub>O prior to autoclaving in order to remove residual detergents that may  
151 remain on glassware from dishwashing. This step may increase competency. Autoclaving with  
152 water, which is then discarded, is even better.) EcN was inoculated in 5 ml LB medium and  
153 grown overnight at 37°C with rotation. On the next day, 5 ml of overnight cultures were added  
154 to 450 ml LB medium and incubated at 37°C with vigorous shaking until the OD 600 nm was  
155 between 0.5 and 1.0. This step usually takes about 3 hours. The centrifuge was fast-cooled with  
156 the correct rotor at 4°C and cultures were poured into two 225 ml centrifuge tubes. The tubes  
157 were placed on ice for 15 minutes. Longer incubation up to 1 hour is possible and may lead to  
158 higher competency.

159

160 *For the following steps it is important to keep cells cold and remove all the supernatant in each*  
161 *step to remove residual ions.*

162

163 The cells were centrifuged for 10 minutes at 2'000g at 4°C. Afterwards, the supernatant was  
164 removed and the cell pellets were gently resuspended with 200 ml cold sterile water. Initially,  
165 10 - 20 ml of cold water was used to resuspend the pellet by pipetting and then the rest of the  
166 water was added. The cells were centrifuged again for 15 minutes at 2'000g at 4°C. The  
167 supernatant was removed and the pellets were resuspended with 200 ml cold sterile water. The

168 cell suspensions were held on ice for 30 minutes before they were centrifuged for the third time  
169 for 15 minutes at 2'000g at 4°C. The supernatant was removed and the cell pellets were  
170 resuspended with 25 ml cold 10% glycerol. The mixture can be optionally transferred to a 50  
171 ml conical tube. The cells were placed on ice for 30 minutes. Afterwards, a next centrifugation  
172 step for 15 minutes at 1'500g and 4°C was performed and the supernatant was removed. 500  
173 µl of 10% glycerol was added to the pellets and the cells were resuspended in a final volume  
174 of approximately 1 ml. 50 µl aliquots were prepared (tubes on ice) and the cell suspension was  
175 shock frozen in a dry ice and ethanol bath. The aliquots were then stored at -80°C.

176

### 177 **1.7. Electroporation**

178 1.5 ml reaction tubes were prepared containing 100 ng of each plasmid DNA (correct Nb & SS  
179 plasmid names according to list). The electroporation cuvettes (electroporation cuvettes plus,  
180 model no. 610, 1 mm) and reaction tubes containing the DNA were placed on ice.  
181 Electrocompetent *E. coli Nissle 1917* cells were thawed on ice for about 10 minutes and 40 µl  
182 of EcN was added to the reaction tubes and mixed well by flicking the tubes gently. The mixture  
183 was then transferred to a chilled microcentrifuge tube. The cell / DNA suspension was carefully  
184 transferred into a chilled cuvette without introducing bubbles. It is important that the cells  
185 deposit across the bottom of the cuvette. The electroporation (Gene Pulser Xcell  
186 electroporation system) was then performed using the following conditions: 1800 V, 600 Ω,  
187 and 10 µF. The typical time constant is approximately 4 milliseconds. After the electroporation,  
188 1 ml of LB medium was immediately added to the cuvette and gently mixed up and down twice  
189 before the cells were transferred to a new 1.5 ml reaction tube. The cells were incubated for  
190 30 minutes while shaking at 37 °C and 160 r.p.m. for recovery. Afterwards, 100 µl of cells were  
191 spread onto selective plates, supplemented with ampicillin and chloramphenicol. For liquid  
192 cultures, 100 µl cells were added into 5ml selective media, once with normal antibiotics

193 concentrations (5ul Amp, 2.5ul Chlor) and once with half the concentrations (2.5ul Amp, 1.25ul  
194 Chlor). The plates and liquid precultures were incubated at 37°C overnight.

195

## 196 **1.8. Western Blot**

197 To quantify the presence of nanobodies in the supernatant of double-transformed and  
198 induced EcN, a western blot was performed. 50 µl of supernatant (or lysate in the case of testing  
199 for intracellular nanobodies) were added to 12.5 µl 5x Protein loading dye. 20 µl of the samples  
200 were run on a 4 - 20% gradient gel in MOPS buffer for 50 minutes at 140 V. The gel and blotting  
201 paper were soaked in transfer buffer (20 mL 100% methanol, 20 mL 10x transfer buffer, 0.2g  
202 SDS, 160 mL water). The membrane was first soaked in 100% methanol before placed into the  
203 transfer buffer. The assembly of the blot was then performed as following (from top to bottom):  
204 Blotting paper - gel - membrane - blotting paper.

205

206 The transfer was conducted at 12 V in Trans-blot SD semi dry transfer cell for 0.5 - 1 hour. In  
207 the meantime, 800 ml of PBS-T (0.05% Tween 20 added to PBS) and 250 ml of blocking buffer  
208 (250 ml PBS-T and 7.5 g BSA) were prepared. After the transfer, the membrane was blocked  
209 for 0.5 - 1 hour in blocking buffer while shaking at room temperature. The membrane was then  
210 incubated with the primary antibody (5 ml blocking buffer and 1 µl anti-myc antibody). The  
211 membrane was placed into a 50 ml falcon tube containing the primary antibody solution and  
212 incubated for 0.5 to 1 hour while rotating. The membrane was washed three times with PBS-T  
213 for 5 minutes while shaking. The secondary antibody solution was prepared using 25 ml  
214 blocking buffer and 1 µl anti-mouse antibody. The membrane was incubated with the secondary  
215 antibody for 0.5 to 1 hour while shaking. Afterwards, it was washed three times with PBS-T  
216 for 5 minutes while shaking. Imaging was performed with an Image Quant 800. A 1:1 ratio of  
217 immobilon western blot HRP substrate peroxidase solution and immobilon western blot HRP



218 substrate luminol reagent were mixed (1 ml per membrane required) in an Eppendorf tube. The  
219 developing solution was slowly added to the membrane and bands were imaged  
220 (chemiluminescence setting with colorimetric marker for ladder).

221 To analyze the relative intensities of the bands we used the protocol by Hossein Davarinejad<sup>1</sup>  
222 and visualized the data with R.

223

224

## 225 **2. Plasmid design and construction**

226

### 227 **2.1. Secretion plasmid design**

228 All plasmids were designed in Benchling and the sequences for the HlyB and HlyD of the  
229 secretion system plasmid as well as the HlyA-tag integrated in the nanobody plasmid were  
230 obtained from<sup>2</sup>. TolC is endogenously expressed in *E. coli* strains and is therefore not necessary  
231 to be integrated in a plasmid. Generally, all promoter, RBS, and double terminator sequences  
232 were obtained from the corresponding iGEM parts registry. The arabinose-inducible system  
233 consisting of the pBad promoter and araC, as well as the myc-tag were adapted from the  
234 pSBinit<sup>3</sup> plasmid (addgene #110100).

235

### 236 **2.2. NO-sensing plasmids design**

237 All plasmids were designed in Benchling and the sequences for pNorV $\beta$ , sfGFP and NorR were  
238 obtained from Chen XJ et al.<sup>4</sup>. NorR was further optimized to avoid repetitive sequences.  
239 Generally, RBS and double terminator sequences were obtained from the corresponding iGEM  
240 parts registry. The sequence for the wild-type pNorV was obtained from previous iGEM work  
241 ([http://parts.igem.org/Part:BBa\\_K2116002](http://parts.igem.org/Part:BBa_K2116002)).

242

243 The different nanobody candidates were ordered as fragments from IDT. The amino acid  
244 sequences of the nanobodies used in this study were taken from the patent of Karen Silence et  
245 al<sup>5</sup> (Int. Publication Number: WO 2004/041862 A2) and converted to their corresponding DNA  
246 sequences using the Expasy software.

247

248 Codon optimization for *E. coli* was performed on all plasmids and DNA fragments using the  
249 integrated codon optimization tool offered by Twist Bioscience.

### 250 **2.3 Plasmid cloning**

251 Adjusting the number of RBS upstream of GFP as well as combining the NO-sensor with the  
252 nanobody (Nb1) were performed by Gibson assembly. For this purpose, fragments were  
253 ordered from IDT (for the RBS) or linearized from a miniprepped plasmid vector (for the  
254 nanobody) and mixed with the miniprepped linearized backbone following the protocol  
255 described earlier. Pure linearized fragments and backbones were obtained by gel extraction.

256

### 257 **3. Model supplementary methods**

258

259 The gut surface section is constructed as a square matrix with N rows and N columns with each  
260 entry representing a  $1\mu\text{m}^3$  volume and the entire grid representing an area of  $1\text{mm}^2$ . Some grid  
261 areas are randomly assigned the status "inflamed," and start producing NO and  $\text{TNF}\alpha$ . After  
262 the initial setups,  $\text{TNF}\alpha$  levels decide whether the status "inflamed" is maintained. If  $\text{TNF}\alpha$   
263 levels drop below a certain threshold, the status switches to "uninflamed". *E. coli* bacteria are  
264 randomly distributed across the grid and occupy a single instance of our grid as they have a  
265 rough volume of around  $1\mu\text{m}^3$ . If the grid cell of a bacteria reaches an NO concentration above  
266 their sensing threshold, they produce nanobodies in their grid element. All particles are  
267 measured in  $\text{mol}/\mu\text{m}^3$ .

268

269 The particles (NO,  $\text{TNF}\alpha$ , and nanobodies) are subject to diffusion and decay over time. If  
270 concentrations of nanobodies and  $\text{TNF}\alpha$  overlap in the same  $1\mu\text{m}^3$ , we assume that they will  
271 bind and cancel each other out in a 3:1 nanobodies: $\text{TNF}\alpha$  ratio, as we target three possible  
272 binding sites.

273

274 Our model follows a cycle of operations comprising four steps in the following order: 1)  
275 particle production, 2) particle diffusion and decay, 3) nanobody and TNF $\alpha$  binding and  
276 canceling, and 4) data collection or plotting.

277

### 278 **3.1. Assumptions and parameters**

279 We made the following simplifications and assumptions in our model: Bacteria attach to the  
280 gut surface and remain static without dying/turnover, NO sensing and nanobody production is  
281 immediate, without any time lag, inflammation sites can only shrink and not expand, and the  
282 compounds only interact with themselves during diffusion.

283

#### 284 **Number of inflammatory sites**

285 This parameter corresponds to the count of inflammatory sites generated. Given the broad  
286 variability among human patients with IBD, the parameter was arbitrarily set to a default of 50  
287 inflammation sites with variable sizes, to represent a broad range of conditions.

288

#### 289 **Number of bacteria**

290 The amount of bacteria that are able to remain in the gut and produce nanobodies is crucial for  
291 the efficacy of the treatment, but hard to assess without further studies into the fitness of our  
292 engineered bacteria. Studies have estimated the bacterial density in the colon as  $10^{11}$  per  
293 milliliter of gut content<sup>6</sup>. In our model this equates to a probability of around 0.1 that a grid  
294 entry is filled with bacteria. For our simulation we chose a default value such that our treatment  
295 will replace around 20 out of an estimated  $10^5$  gut bacteria per  $\text{mm}^2$ <sup>7,8</sup>. This gives a sufficient  
296 coverage of the gut based on our simulations.

297

298

### 299 3.4. Emission coefficients

300 Each grid element that is part of an inflammation site produces a fixed amount of NO and  
301 TNF $\alpha$ . Since there is no data on NO and TNF $\alpha$  concentrations around inflammation sites in the  
302 gut, we used the values from the medium concentrations in blood serum samples of IBD  
303 patients, with NO concentrations between 14.54  $\mu\text{mol/L}$  and 15.25  $\mu\text{mol/L}$ <sup>9</sup>. We used a default  
304 value of 15  $\mu\text{mol/L}$  and changed it into our standard unit to get  $1.5 \times 10^{-20} \text{ mol}/\mu\text{m}^3$ . TNF $\alpha$   
305 concentrations in the blood serum of UC patients lie around  $8.3 \pm 2.5 \text{ pg/ml}$  and in CD around  
306  $5.4 \pm 1.7 \text{ pg/ml}$ <sup>10</sup>. We chose a default value of 5.4 pg/ml which results in  $3.12 \times 10^{-28} \text{ mol}/\mu\text{m}^3$   
307 when considering a weight of 17.4kD. As these are rough estimates, a lot of different  
308 concentrations have been tested, and do not seem to greatly influence the efficacy.

309

310 If a grid element contains bacteria and the concentration of NO is above the sensing threshold  
311 of the bacteria, nanobodies are produced. The grid element's nanobody concentration increases  
312 by a default concentration of  $1.66 \times 10^{-21} \text{ mol}/\mu\text{m}^3$ . The value is extrapolated from the lower  
313 bound concentrations produced by an *E.coli* population<sup>11</sup>. However, this concentration is only  
314 reached if the simulation were to assume complete colonization of the gut. The actual values  
315 could greatly differ and as such have been explored in our model.

316

317 We used  $2.6 \times 10^{-20} \text{ mol NO}/\mu\text{m}^3$  as our default sensing threshold, but a recent paper has shown  
318 a ten times more sensitive threshold<sup>4</sup>, which might be necessary for the treatment. Experiments  
319 were made with the assumptions that we could replicate the results and work with a higher  
320 sensitivity.

321

322

323

### 324 **3.5. Diffusion Coefficients**

325 The diffusion coefficients used are  $3300 \mu\text{m}^2$  per second for NO <sup>12</sup> and  $7.28 \mu\text{m}^2$  per second  
326 for TNF $\alpha$  based on proteins of similar size <sup>13,14</sup> for the nanobodies we chose  $40 \mu\text{m}^2$  based on  
327 the same calculations <sup>15</sup>, which is similar to the upper bound for antibodies <sup>16</sup>. The actual  
328 diffusion speed, however, is likely to be higher and could further improve the efficacy.

329

330 Every particle that leaves its generative environment through diffusion will eventually decay.  
331 To simulate this, we enforce half-lives of each particle. We used a 2 seconds half-life from  
332 studies in extravascular tissue <sup>17</sup>. For TNF $\alpha$ , we used parameters from a study about the half-  
333 life of TNF $\alpha$  from intravenous injections in rats. The researchers found near dose-independent  
334 decay of around 30 minutes half-life in the high-dosage conditions <sup>18</sup>. As all nanobodies are  
335 structurally similar, we used a half-life estimate of 12 minutes which is the average half-life  
336 described in a paper about nanobodies as imaging agents <sup>16</sup>. Some studies have shown that the  
337 half-life can be extended up to multiple days <sup>19</sup>, which would trade ease of production for a  
338 longer lifespan.

339

### 340 **3.6. Emission Dynamics**

341 The emission rates of NO and TNF $\alpha$  particles were designed to maintain a constant particle  
342 density by compensating for the losses. When increasing the time-scale model, we need to  
343 ensure that sufficient particles are introduced to bridge the period where no additional particles  
344 are added. To illustrate a transition from a timestep of  $n$  seconds to  $10 * n$  seconds, consider an  
345 experiment involving two buckets of water. In the first trial, the initial bucket contains  $e$  liters  
346 of water. We transfer a proportion  $k$  of the water to a second bucket, and subsequently refill the  
347 original bucket to maintain the initial  $e$  liters. This process repeats  $n$  times, resulting in a final  
348 quantity of water  $V$  in the second bucket given by equation [1].

$$V = n * k * e$$

349 [1]

350

351 In the second trial, no refilling takes place and instead we increase the initial volume to a value  
352 of  $e_n$  liters, so that the same amount of water is transferred to the second bucket over  $n$   
353 timesteps, even without refilling the bucket. This corresponds to the need to have an equal  
354 amount of particles spread out through the diffusion and decay-steps over the same number of  
355 time. This achieves the same final volume in the second bucket, even when we transfer  
356 proportion  $k * n$  times without refilling. Given the decreased water volume on each transfer,  
357 the first transfer yields  $k * e_n$  liters, followed by  $k * (1 - k) * e_n$  liters for the second transfer.  
358 The sum of these transfers over  $n$  iterations should equal the volume  $V$  from the first trial and  
359 results in equation [2].

$$V = \sum_{i=0}^{n-1} k * (1 - k)^i * e_n$$

360 [2]

361

362 With [1] and [2] we solve for  $e_n$ , we derive [3]:

$$\frac{n * e}{\sum_{i=0}^{n-1} (1 - k)^i} = e_n$$

363 [3]

364

365 The emission values  $e$  from [1] are therefore replaced by  $e_n$  when scaling the model to higher  
366 time-scales.

367

368 **3.7 Diffusion Dynamics**

369 After the production of particles, they diffuse from their origin. This process can be modeled  
370 using the Heat Equation. By discretizing this partial differential equation (where the Mesh  
371 Fourier number  $F$  corresponds to the product of the diffusion coefficient and the difference in  
372 time over the difference in distance), the propagation of particles in one dimension can be  
373 simulated utilizing the backward Euler scheme.

374

375 For a one-dimensional parameter vector, a two dimensional diffusion matrix  $D$  is needed. The  
376 principal diagonal of the matrix contains the value  $1+2F$ , while the two adjacent diagonals  
377 contain the value  $-F$ . As every particle has a unique diffusion coefficient, a dedicated diffusion  
378 matrix is required for each particle. Given the concentration within a particular grid element,  
379 the new concentrations after one time-step can be calculated by multiplying the parameter  
380 vector  $v$  with the inverse of the diffusion matrix.

381

382 The diffusion process can be extrapolated from one dimension to a two-dimensional parameter  
383 concentration space  $M$ , by multiplying the parameter space as  $D^{-1}MD^{-1}$ . For a more accurate  
384 2D diffusion simulation, a Crank-Nicolson scheme in combination with the Runge-Kutta  
385 scheme could be used. However, this method is significantly more computationally demanding  
386 as it requires a diffusion matrix of size  $N^2*N^2$  of the initial matrix size. To compare the  
387 performance of the two methods, we simulated 30 timesteps using a parameter space of size  
388  $100\mu\text{m}^2$  with an arbitrary diffusion coefficient of  $20\mu\text{m}^2/\text{s}$ , and a starting concentration of  $1$   
389  $\text{mol}/\mu\text{m}^3$  at index  $x=50$  and  $y=50$  and evaluated the resulting diffusion patterns. (see  
390 **Supplementary figure S17**. The approximation results in practically indistinguishable  
391 diffusion patterns for high diffusion coefficients and confirm our choice of diffusion modeling.

392



393 To compensate for the discrete emission and diffusion, scaling to larger time-steps needs to be  
 394 compensated. The parametric representation of our particle matrix is given by the current  
 395 concentration space  $M$ . We replaced the emission  $e$  with  $e_n$  and represent it as the emission  
 396 matrix  $E_n$ , where  $D$  is our diffusion matrix and  $p$  represents our decay parameter. The number  
 397 of repeats is denoted by  $n$ . When increasing from time-step  $n$  to  $10*n$ , a continuous induction  
 398 of particles can be simulated by diffusing 1/10th of the particles ten times, 1/10th diffuse nine  
 399 times, and so forth. The product of these diffusion matrices can be calculated at the beginning  
 400 of the simulation and used as the new diffusion matrix to calculate the diffusion of  $10*n$   
 401 timesteps with the same number of matrix multiplications per timesteps. The same applies for  
 402 the decay of the particles. We can calculate this diffusion matrix, including the decay  
 403 parameters at the beginning of the simulation in [4]:

$$D_{pn} = \sum_{i=1}^n \frac{D^{-i} * \sqrt{p^i}}{n}$$

404 [4]

405 The square root of  $p$  is taken, as we multiply the diffusion matrix twice in the step update.  
 406 Before we updated  $M$  in every timestep. With the new diffusion matrix  $D_{pn}$ ,  $n$  steps of  
 407 simulation can be calculated in a single step as in [5]:

$$(D^{-1}(M + E) * p * D^{-1})^n = D_{pn}(M + E_n)D_{pn}$$

408 [5]

409 To discrete the diffusion accurately, an initial diffusion matrix for 1 millisecond is used to  
 410 calculate the final diffusion matrices.

411 **4. Supplementary Tables**

412

413 **4.1. Table S1. List of oligos used in this study:**

| <b>Name</b>                        | <b>Sequence</b>                                                                  |
|------------------------------------|----------------------------------------------------------------------------------|
| oiGEM15 (fwd) - +Nb                | TAAGCTCTTCGTGGAAAGAGGAGAAAATGAGTTTTAGC<br>GTTGAC                                 |
| oiGEM16 (rev) - +Nb                | CTCTTTCCACGAAGAGCTTATTATGCTGATGCTGTCAAA<br>GTTATTG                               |
| oiGEM17 (fwd) -+Nb                 | ATGAGTCAAGTCCAATTACAGGAGAGCGGTGGCGGGC                                            |
| oiGEM18 (rev) - 1RBS<br>+Nb        | CCTGTAATTGGACTTGACTCATTTTCTCCTCTTTCTAATG<br>AAGAGCC                              |
| oiGEM20 (rev) -<br>2RBS+Nb         | CCTGTAATTGGACTTGACTCATCATCTAGTATTTCTCCTC<br>TTTGGTTTC                            |
| oiGEMnoNOR1 (fwd) -<br>remove NorR | CTCTTCGTGGCCAGGCATCAAATAAAACGAAAGGCTCA<br>GTCGAAAG                               |
| oiGEMnoNOR2 (rev) -<br>remove NorR | GATGCCTGGCCACGAAGAGCTTATTTGTAGAGCTCATC<br>CATGCC                                 |
| oiGEMrbs1 (fwd) - for<br>3RBS      | AGGAGGTTTGGATTACACAGGAAACCAAAGAGGAGA<br>AATACTAGATGATGAGCAAAGGAGAAGAAGACTTTTCAC  |
| oiGEMrbs2 (rev) - for 3<br>RBS     | CATCTAGTATTTCTCCTCTTTGGTTTCCTGTGTGAATCCA<br>AACCTCCTCTAATGAAGAGCCTAAAAGATGTCTTGC |
| oiGEMrbs3 (fwd) - for 2<br>RBS     | TTCACACAGGAAACCAAAGAGGAGAAATACTAGATGA<br>TGAGCAAAGGAGAAGAAGACTTTTCAC             |
| oiGEMrbs4 (rev) - for 2<br>RBS     | CATCTAGTATTTCTCCTCTTTGGTTTCCTGTGTGAACTA<br>ATGAAGAGCCTAAAAGATGTCTTGC             |
| M13 fwd - sequencing               | GTAAAACGACGGCCAGT                                                                |
| M13 rev - sequencing               | GTCATAGCTGTTTCCTG                                                                |

414

415 5. Supplementary Figures

416

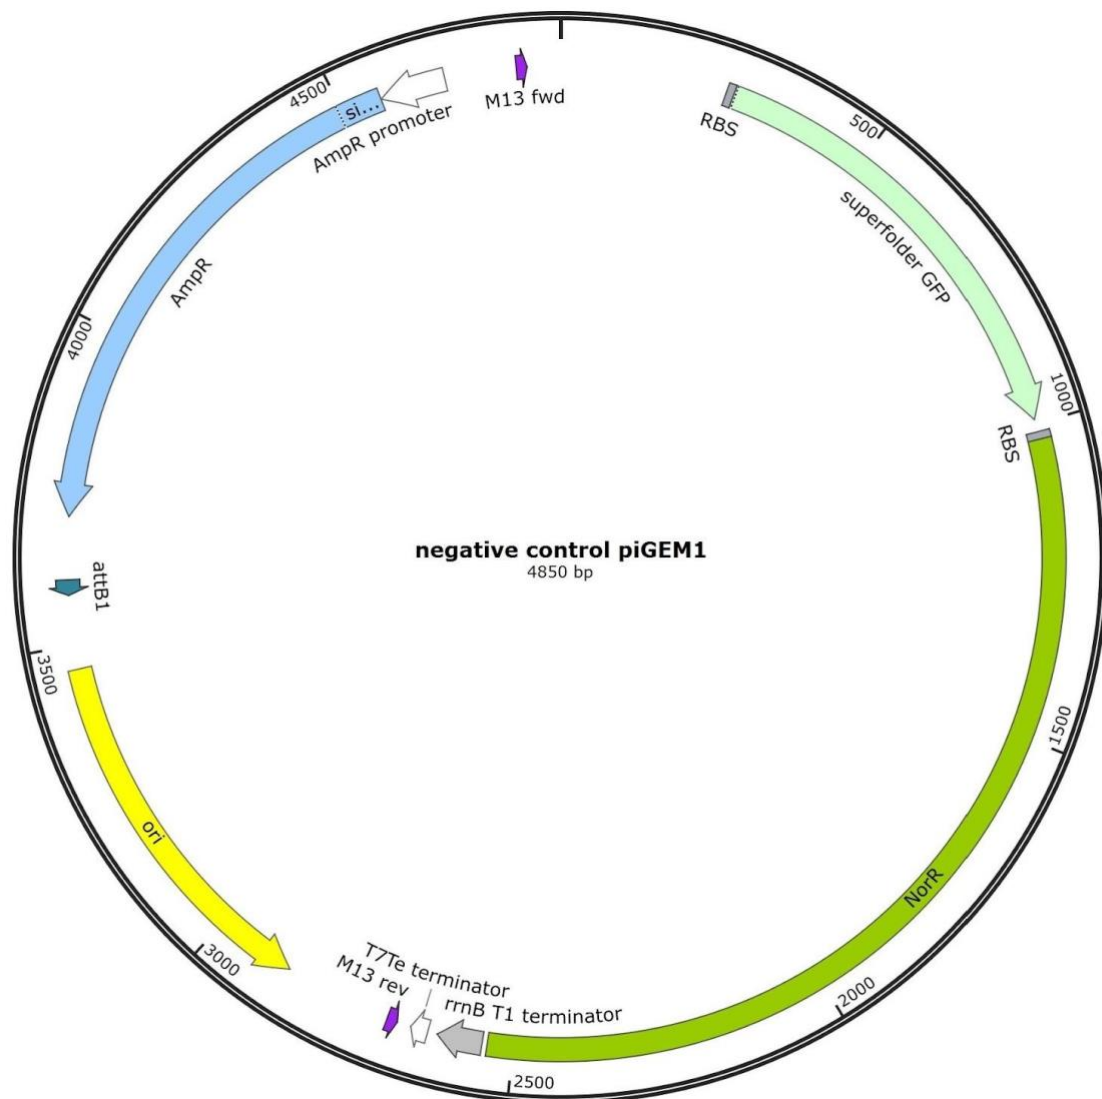

417

418 **5.1. Supplementary figure S1. Plasmid map of the negative control.** The negative control  
419 plasmid encodes a high copy number origin (colE1), a superfolder GFP, the NorR gene for the  
420 positive feedback loop, but no pNorV $\beta$  promoter. This plasmid was used for the normalization  
421 of the plate reader fluorescence assay data to characterize the NO sensor.

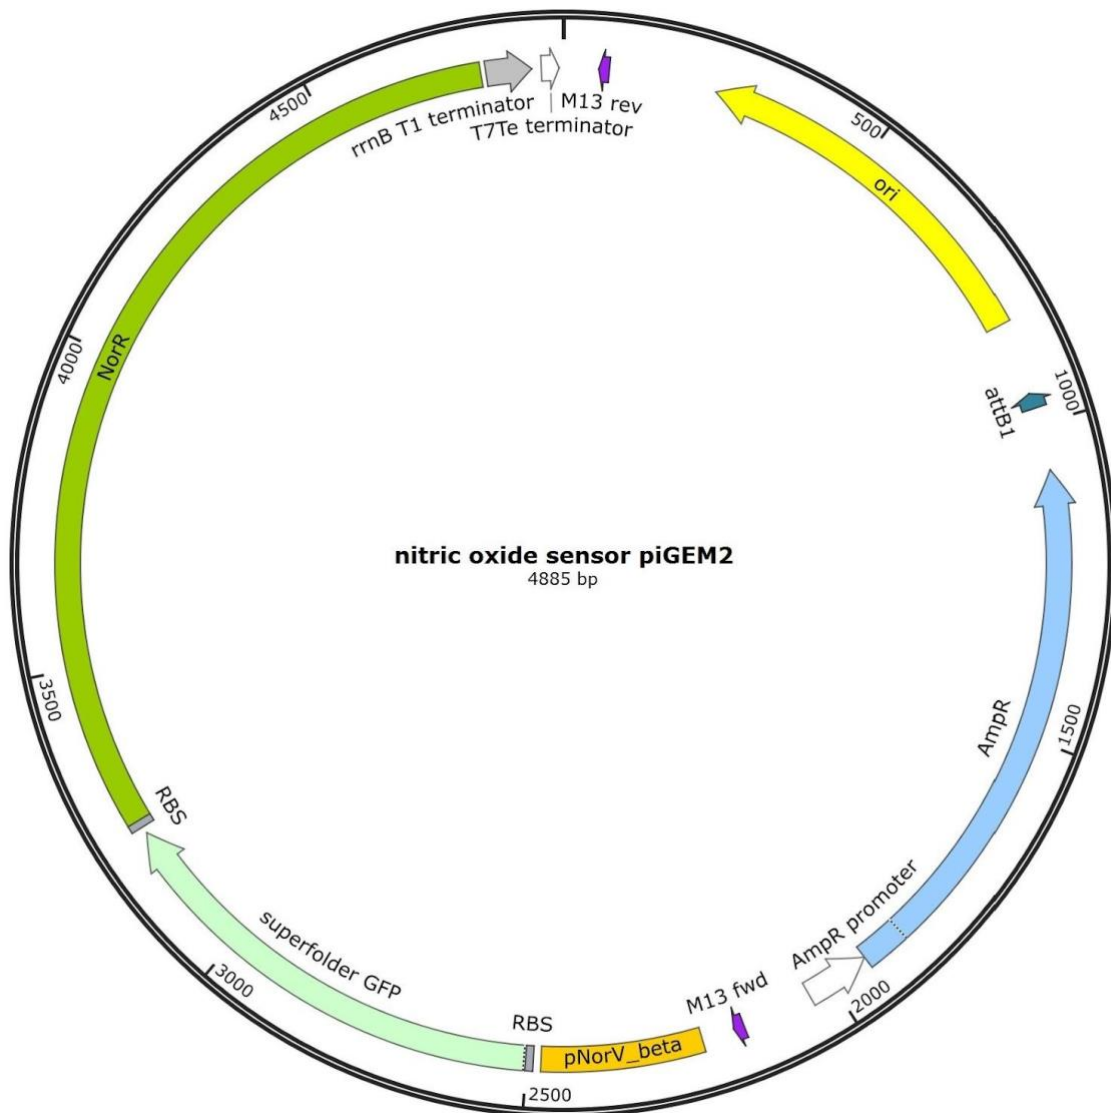

422

423 **5.2. Supplementary figure S2. Plasmid map of the engineered nitric oxide sensor piGEM2**

424 **(B-1).** The piGEM2 plasmid encodes a high copy number origin (colE1), a superfolder GFP,

425 the NorR gene for the positive feedback loop, and the pNorV $\beta$  promoter preceded by 1 RBS.

426 Via Gibson Assembly, this plasmid was further modified to obtain the  $\beta$ -2 and  $\beta$ -3 plasmids

427 containing two or 3 RBS. This plasmid was used for the plate reader fluorescence assays, to

428 characterize the NO sensor.

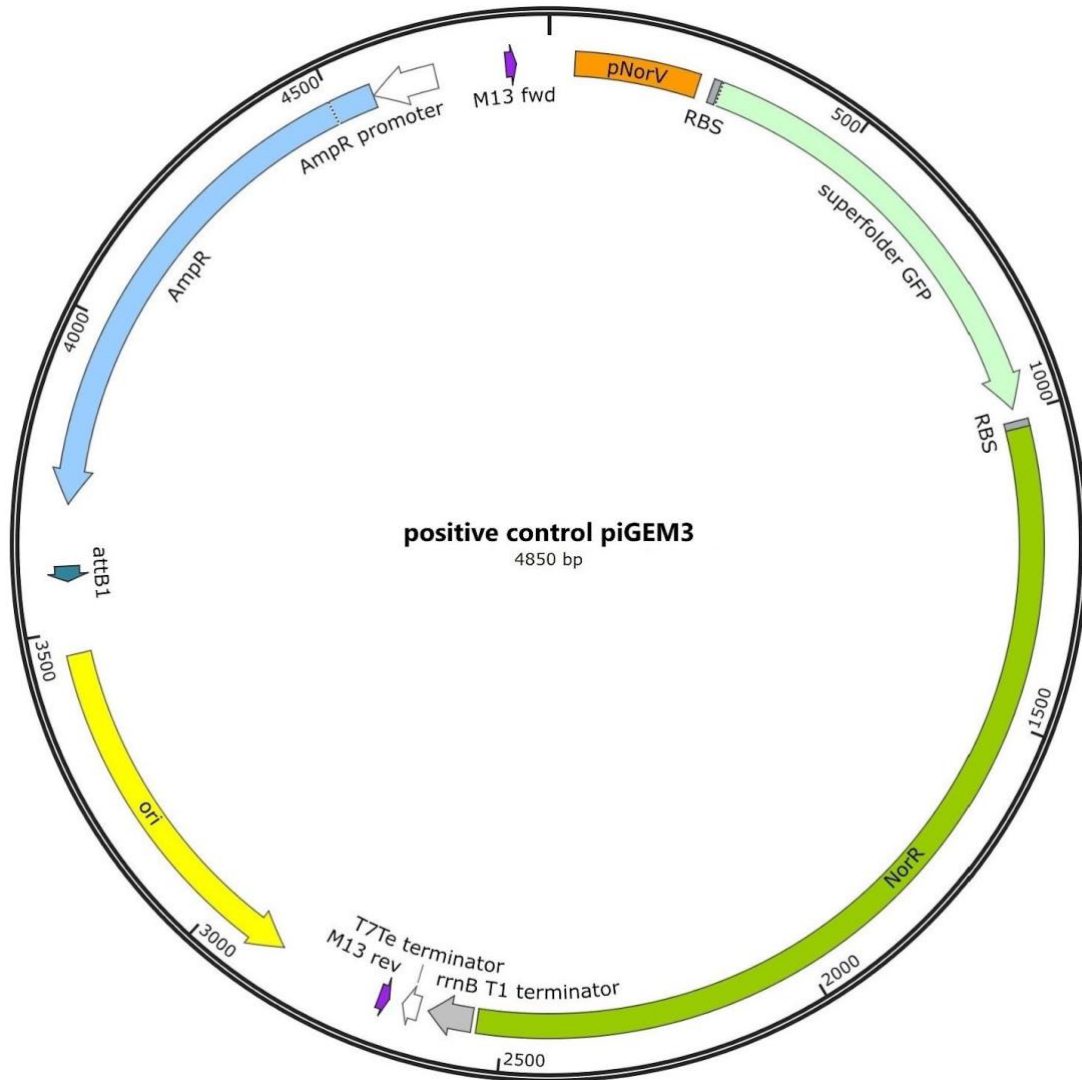

429

430 **5.3. Supplementary figure S3. Plasmid map of the engineered nitric oxide sensor piGEM3**

431 **(WT).** The piGEM3 plasmid encodes a high copy number origin (colE1), a superfolder GFP,

432 the NorR gene for the positive feedback loop, and the wild-type pNorV $\beta$  promoter preceded

433 by 1 RBS. This plasmid was used as a positive control for the plate reader fluorescence assays,

434 to characterize the NO sensor.

435

436

437

438

439

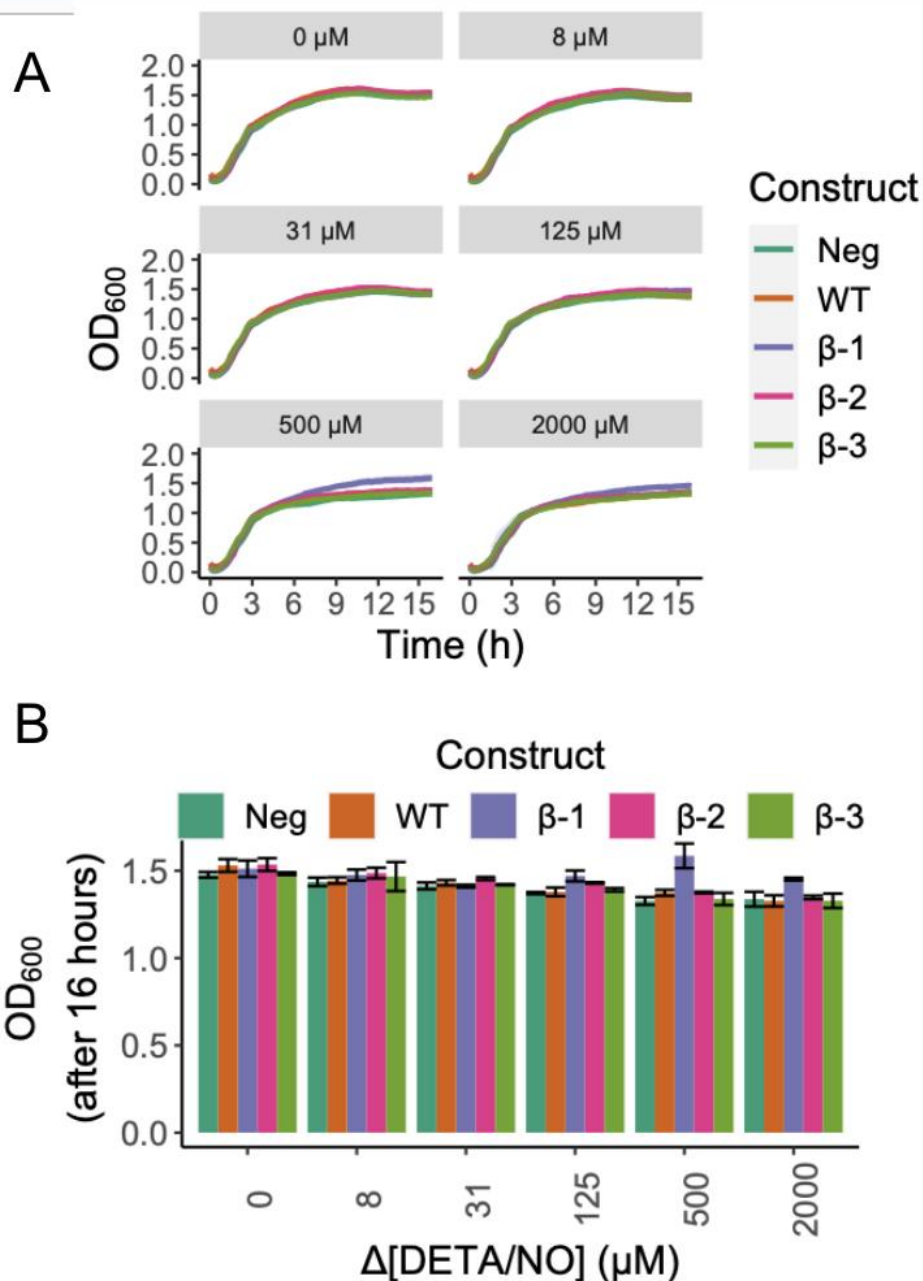

440

441 **5.4. Supplementary figure S4. DETA/NO has little effect on cellular growth.** a. Time-lapse  
 442 growth assay for constructs on different NO concentrations. We have grown each construct for  
 443 16 hours (x-axis) on a microplate reader where OD600 was measured every 15 minutes. The  
 444 y-axis represents OD600 values. Each grid represents a different concentration of DETA/NO  
 445 in which cells harboring each construct were grown. DETA/NO gradients used were 0, 8,  
 446 31,125,500, and 2000 $\mu\text{M}$ . Each line color represents a construct. Line shadings represent the  
 447 standard deviation of our biological replicates ( $n=3$ ). We performed all measurements with

448 both biological and technical triplicates. **b. Endpoint growth measurement for constructs**  
449 **on different NO concentrations.** The bar plots represent the OD600 for each construct for  
450 each DETA/NO change of concentration at T = 8h. Error bars represent the standard deviation  
451 of our biological replicates ( $n=3$ ). A slight decrease in OD600 values can be observed with  
452 incremental NO concentrations due to its cellular toxicity.

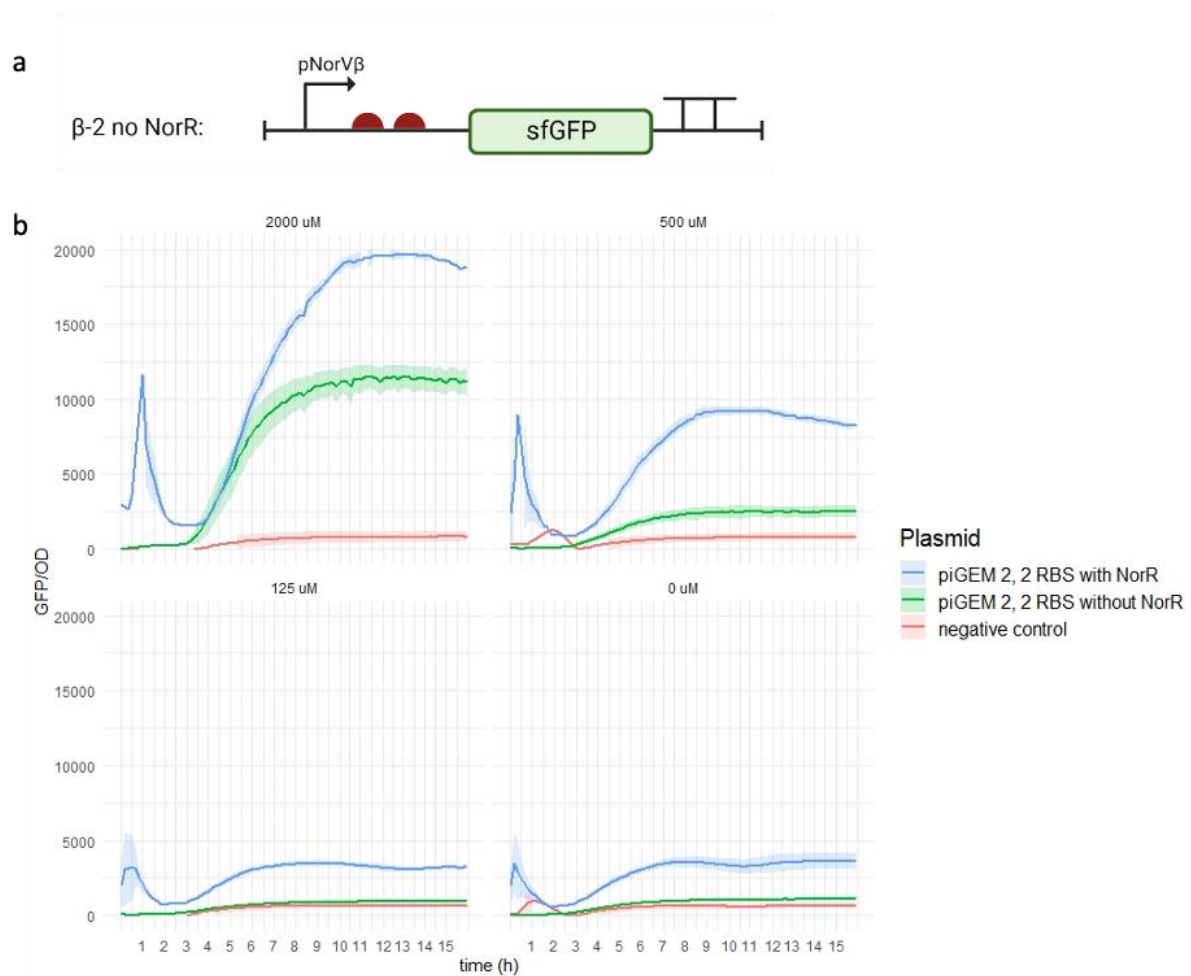

453

454 **5.5. Supplementary figure S5. The removal of the plasmid-expressed NorR reduces**  
 455 **sensitivity and response strength to NO. a. Schematic representation of β-2 without NorR.**

456 To underline the importance of a positive feedback loop in the sensing module, we also tested  
 457 the circuit with 2 RBSs after removal of the transcription factor NorR and its corresponding  
 458 RBS. b. **Response of our construct with 2 RBSs +/- NorR to induction with DETA/NO.**

459 The removal of NorR disabled the positive feedback mechanism and did not improve the  
 460 sensitivity of our construct to nitric oxide (NO).



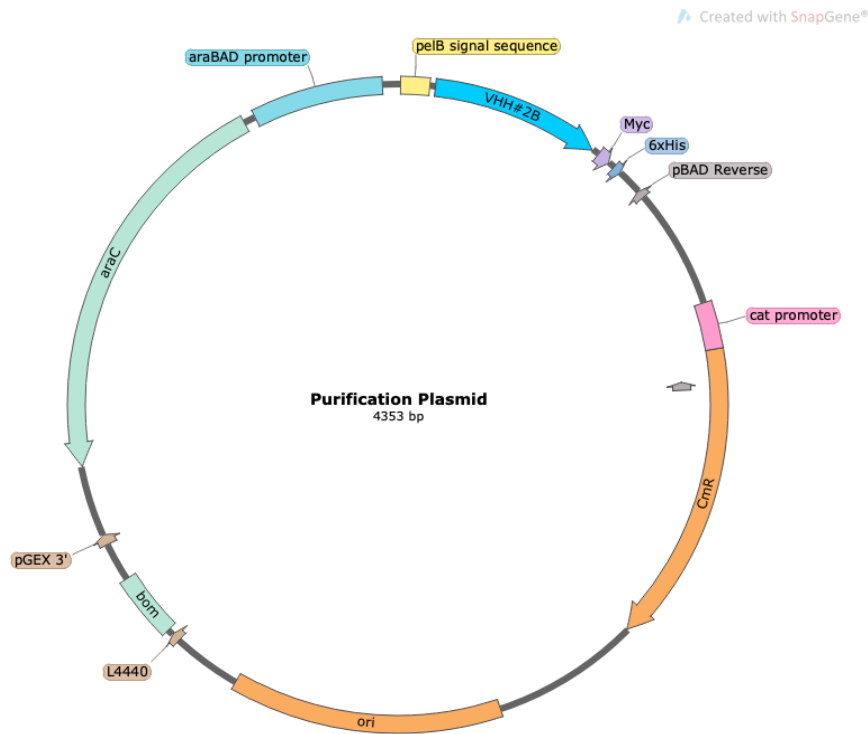

461

462 **5.6. Supplementary figure S6. Plasmid map of the nanobody purification plasmid.** The

463 purification plasmid encodes a high copy number origin (colE1), a FX cloning site allowing

464 the exchange of the protein of interest to be purified, a Myc- and His-tag which is automatically

465 added to the protein upon successful integration, and the inducible araBAD promoter with the

466 corresponding araC gene. Additionally, a pelB signal is incorporated, allowing the directed

467 protein transportation to the bacterial periplasm.

468

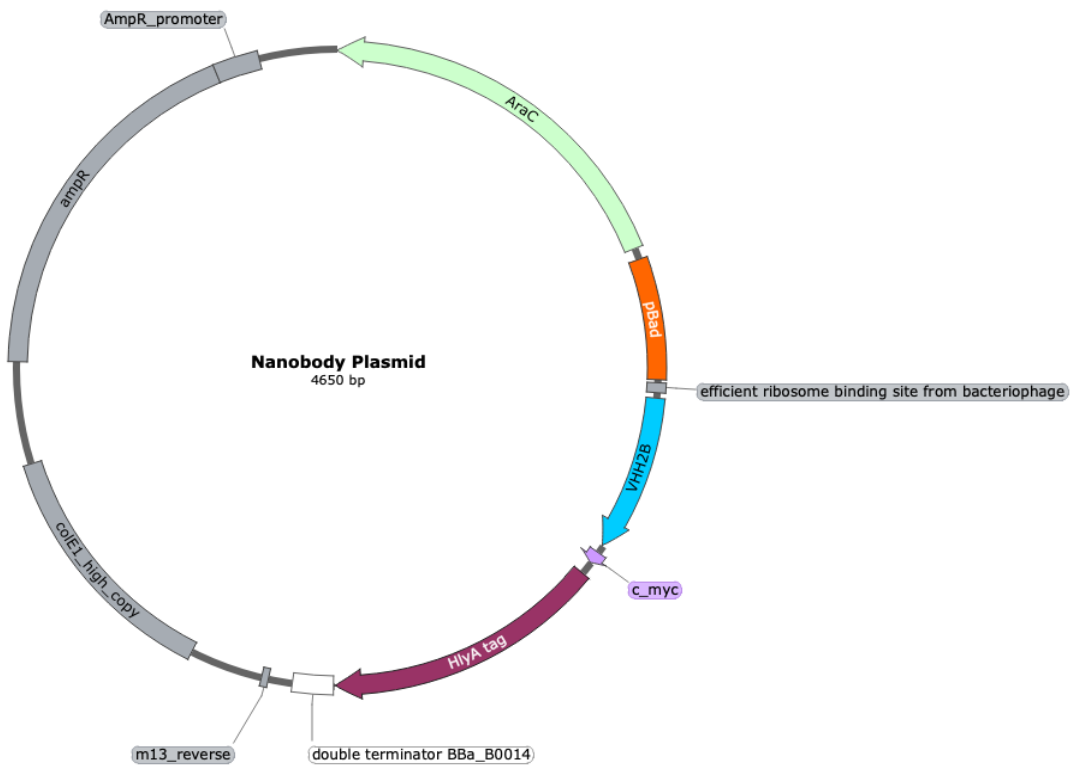

470

471 **5.7. Supplementary figure S7. Plasmid map of arabinose-induced nanobody expression**472 **plasmid.** The nanobody plasmid encodes a high copy number origin (colE1), an

473 interchangeable region flanked by two SapI sites for exchanging the protein of interest, a Myc-

474 and HlyA-tag which is automatically added to the protein upon successful exchange, and the

475 inducible araBAD promoter with the corresponding araC gene.

476

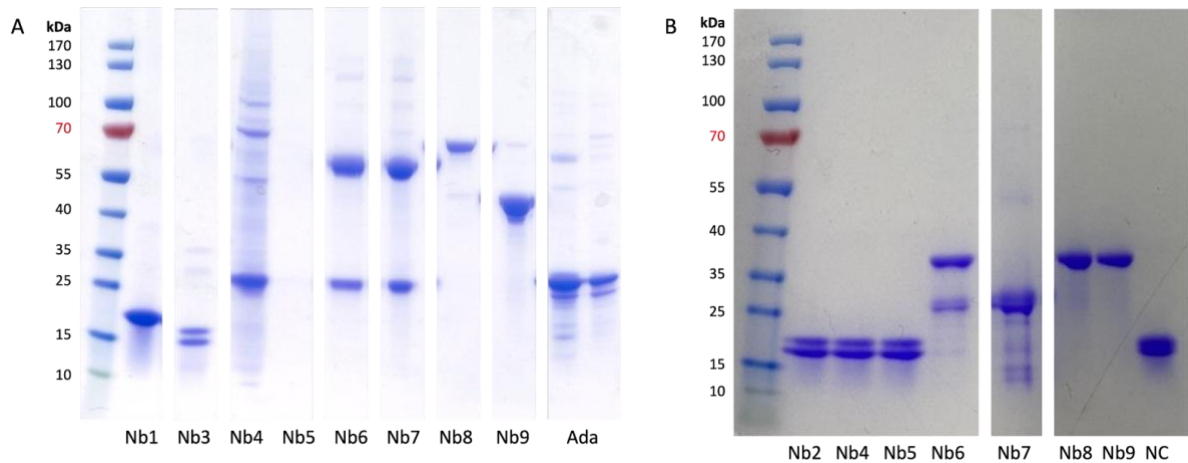

477

478 **5.8. Supplementary figure S8. Purification of monovalent and bivalent anti-TNF $\alpha$**

479 **nanobodies from *E. coli* MC1061 a. Periplasmic extraction performed for all nanobodies.**

480 Periplasmic extraction was being particularly impactful on bivalent nanobody constructs,

481 where the harsh conditions of the extraction led to the breakage of the linkers between coupled

482 nanobodies. Additionally, the figure showcases the production of Adalimumab (Ada) in

483 HEK213 cells, followed by its purification using immobilized metal anion chromatography

484 (IMAC). **b. Periplasmic extraction only performed for monovalent nanobodies and whole**

485 **cell lysis for bivalent ones.** Whole cell lysis is more suitable to purify bivalent nanobodies.

486

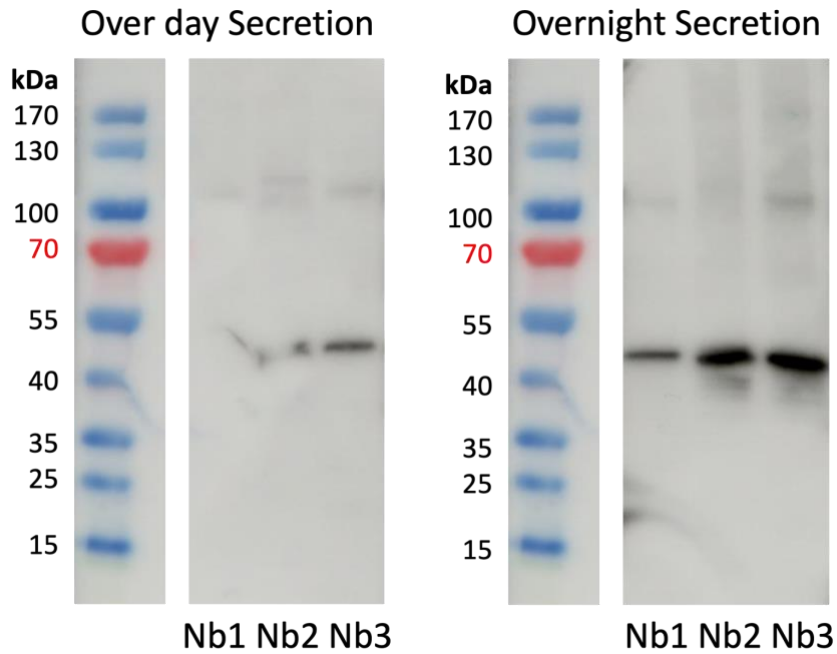

487

488 **5.9. Supplementary figure S9. Comparison of over day to overnight arabinose-induced**

489 **nanobody secretion in *E. coli* MC1061.** Double transformed *E. coli* MC1061 were induced

490 by arabinose and incubated at 37°C either over day for 5 hours or overnight for approximately

491 15 hours. In order to receive enough nanobodies for further testing the overnight induced

492 nanobody expression was continued to be used for the following experiments.

493

494

495

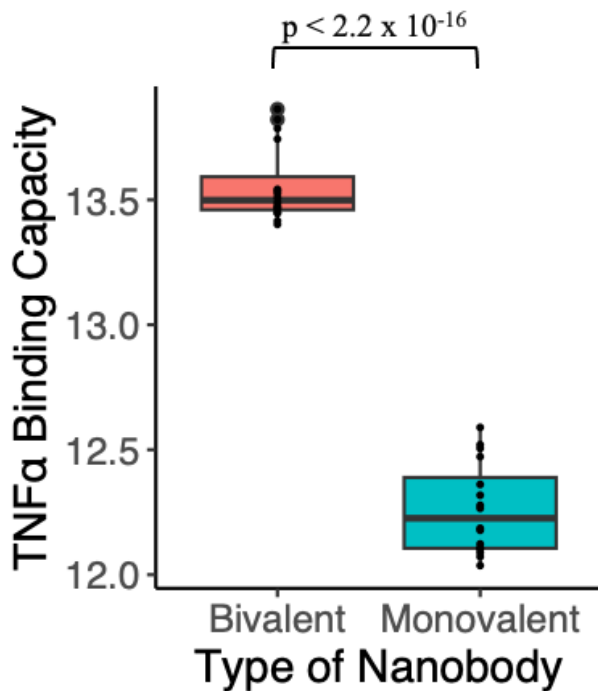

496

497 **5.10. Supplementary figure S10. Comparison of TNF $\alpha$  binding capacity between**

498 **monovalent and bivalent nanobodies.** The boxplots illustrate the binding capacity of TNF $\alpha$

499 to monovalent and bivalent nanobodies. The red boxplot represents the set of bivalent

500 nanobodies which demonstrate a mean binding capacity of  $13.5 \pm 0.1$ , while the teal boxplot

501 represents the set of monovalent nanobodies with a mean binding capacity of  $12.3 \pm 0.2$ . A

502 Welch Two Sample t-test reveals a highly significant difference in binding capacities between

503 the groups ( $t = 21.915$ ,  $df = 29$ ,  $p\text{-value} < 2.2e-16$ ), with a 95% confidence interval for the

504 difference in means ranging from 1.175 to 1.416. These results robustly support the superiority

505 in TNF $\alpha$  binding of bivalent constructs over their monovalent counterparts.

506

507

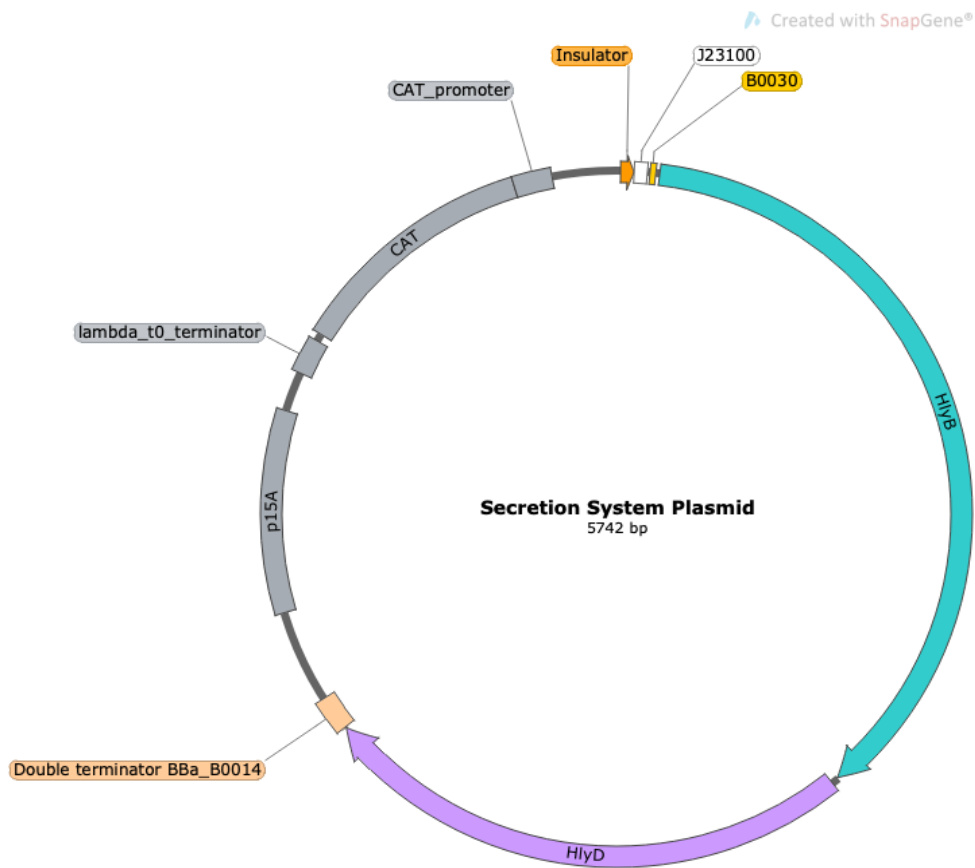

508

509 **5.11. Supplementary figure S11. Plasmid map of the secretion system plasmid.** The  
 510 secretion system plasmid encodes a low copy number origin (p15A), the HlyB and HlyD genes  
 511 required for the functionality of the one-step secretion system, the constitutive J23100  
 512 promoter, and an interchangeable region flanked by two BsmBI-v2 sites for exchanging the  
 513 promoter in order to regulate further the expression of the secretion system machinery.

514

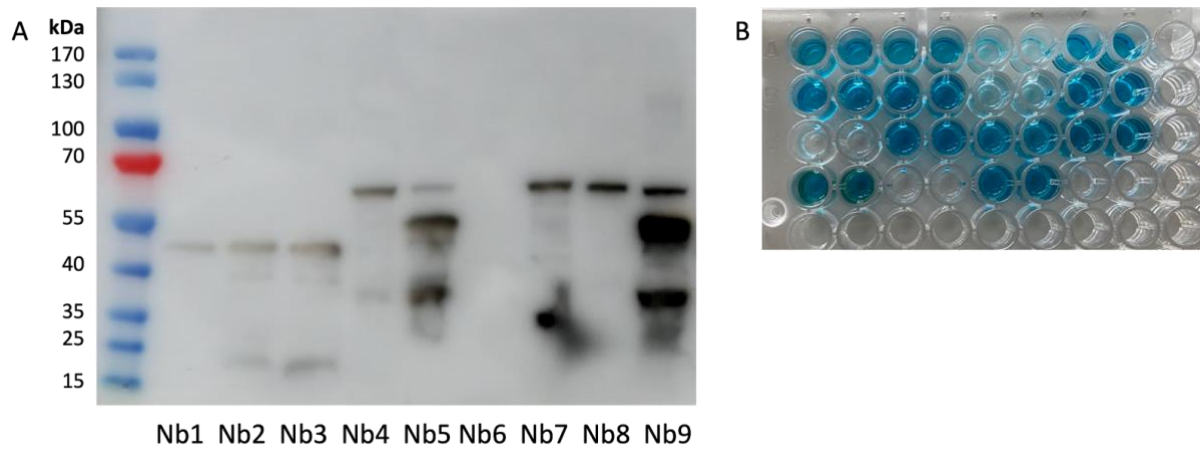

515

516 **5.12. Supplementary figure S12. Arabinose-induced anti-TNF $\alpha$  nanobody secretion in *E.***

517 ***coli MC1061*. a.** Double transformed *E. coli MC1061* were induced by arabinose and incubated

518 at 37°C overnight. Anti-myc antibodies were used in the Western blot to detect secreted

519 nanobodies in the bacterial supernatant. **b. ELISA comparing the TNF $\alpha$ -binding capabilities**

520 **of secreted vs purified nanobodies obtained from *E. coli MC1061*.**

521

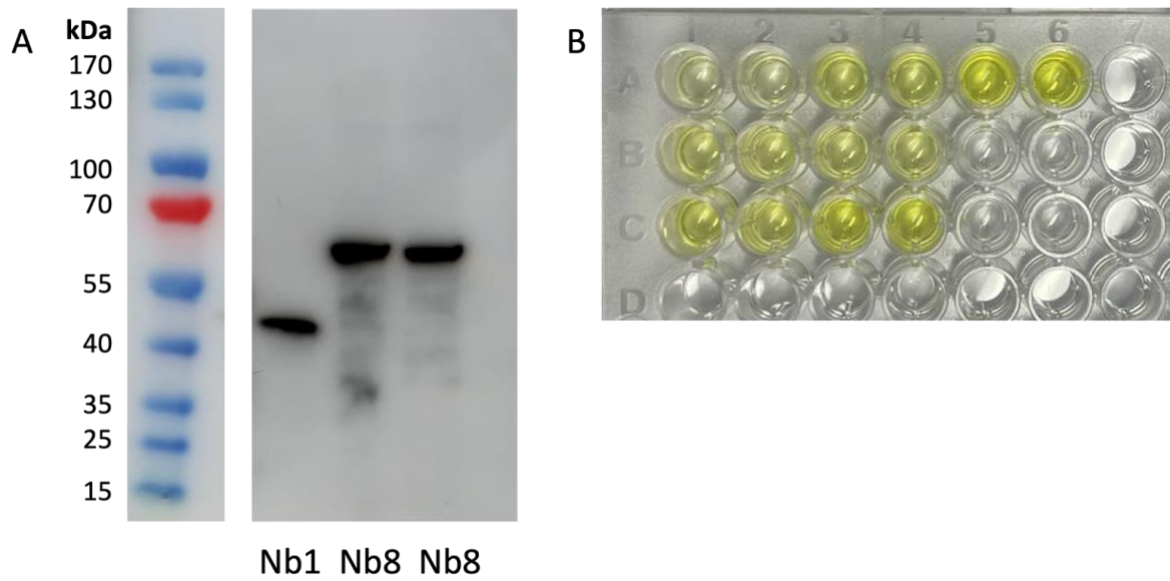

522

523 **5.13. Supplementary figure S13. Arabinose-induced anti-TNF $\alpha$  nanobody secretion in *E.***  
 524 ***coli Nissle 1917.*** **a.** Double transformed EcN were induced by arabinose and incubated at 37°C  
 525 overnight. Anti-myc antibodies were used in the Western blot to detect secreted nanobodies in  
 526 the bacterial supernatant. **b. ELISA displaying the TNF $\alpha$ -binding capabilities of secreted**  
 527 **nanobodies obtained from EcN.**

528

529

530



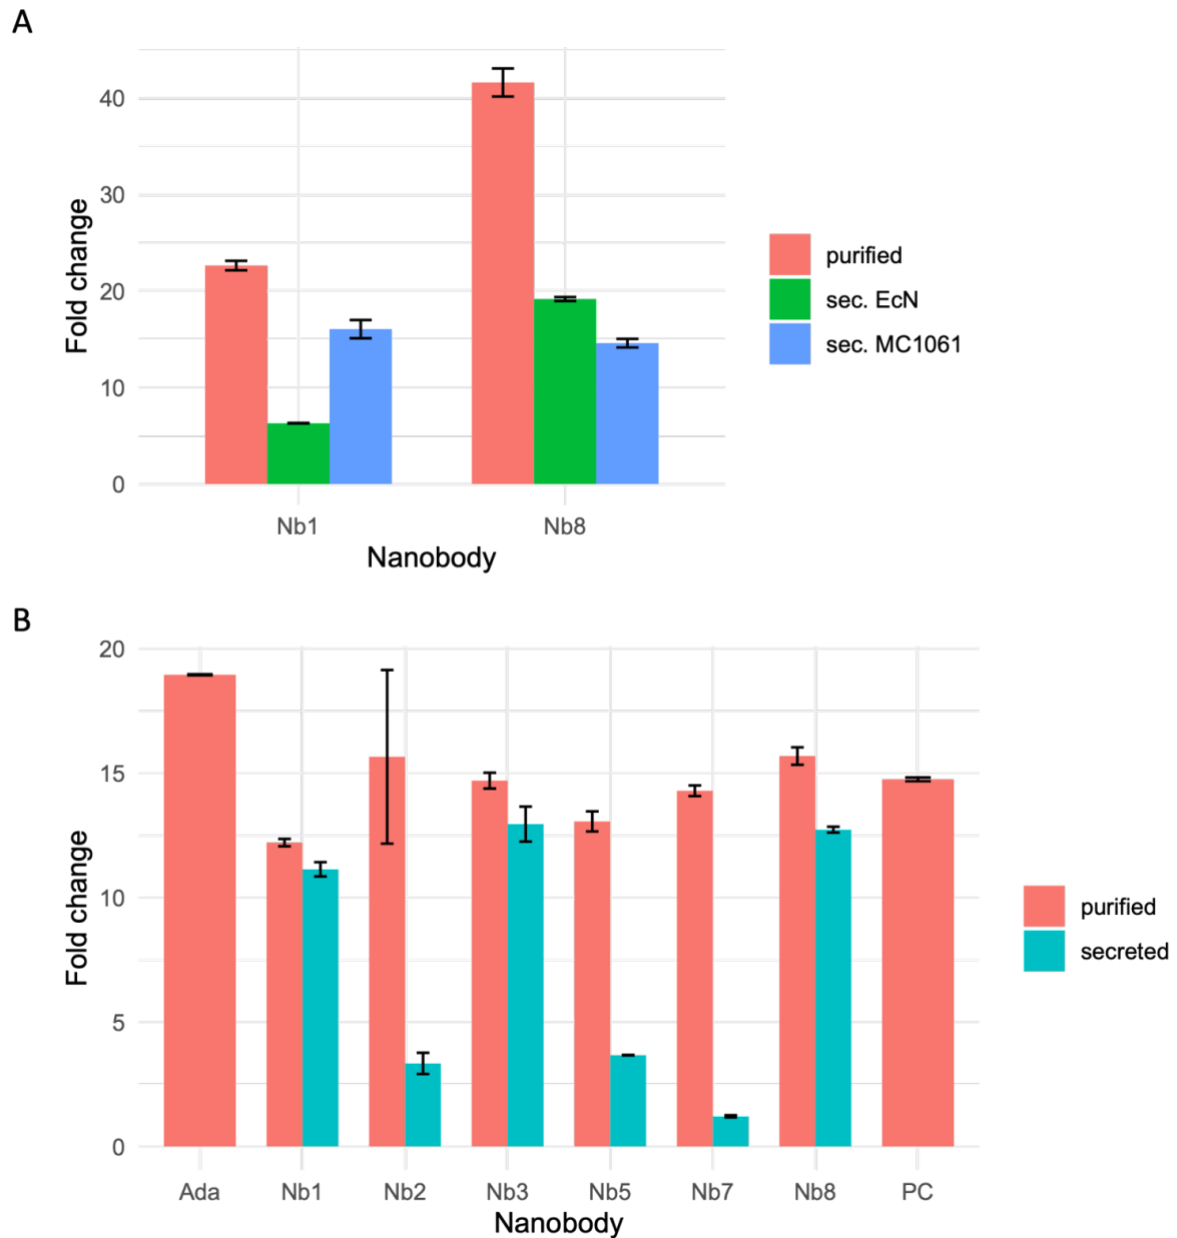

531

532 **5.14. Supplementary figure S14. Analysis of ELISA comparing the binding capabilities of**

533 **purified and secreted monovalent and bivalent anti-TNF $\alpha$  nanobodies in *E. coli Nissle***

534 ***1917* and *E. coli MC1061* a. Comparison of secreted anti-TNF $\alpha$  nanobodies in MC1061 and**

535 **EcN to purified nanobodies obtained from MC1061. B. Comparison of the binding capability**

536 **of purified and secreted anti-TNF $\alpha$  nanobodies obtained from *E. coli MC1061*.**

537

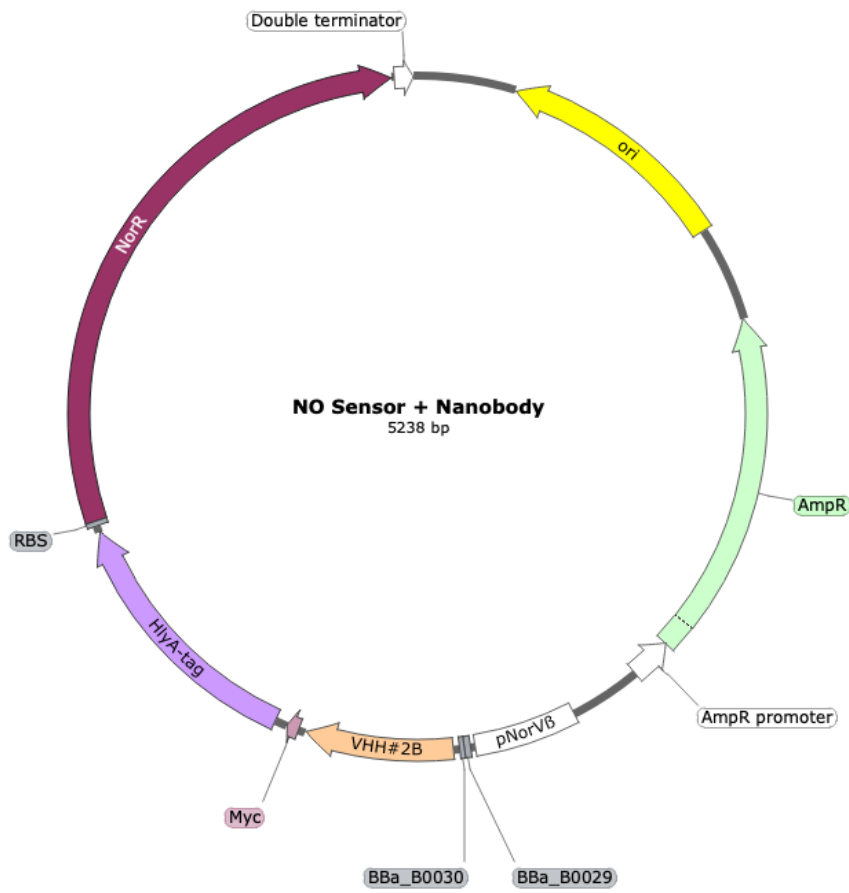

538

539

540 **5.15. Supplementary figure S15. Plasmid map of NO-induced nanobody expression**

541 **system (β-2).** The NO sensor + nanobody plasmid encodes a high copy number origin (colE1),

542 the monovalent nanobody Nb1 with a Myc- and HlyA-tag, and the inducible pNorVβ NO

543 sensor with its corresponding NorR gene for the positive feedback loop. This plasmid map

544 displays the β-2 construct containing 2 RBS in front of the nanobody.

545

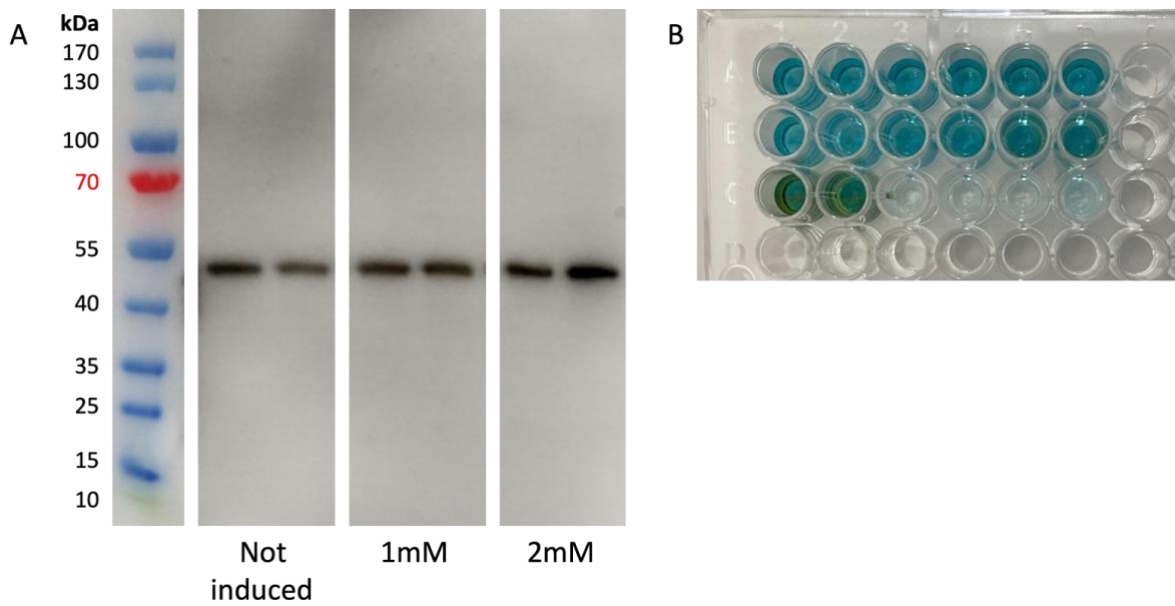

546

547 **5.16. Supplementary figure S16. NO-induced monovalent anti-TNF $\alpha$  nanobody secretion**

548 **and function in *E. coli Nissle 1917*. a.** Double transformed EcN were induced with NO and

549 incubated at 37°C overnight. The expression of the nanobody was under the control of a two-

550 RBS system ( $\beta$ -2) which showed stronger responses and higher production but also high

551 expression leakage. **b.** ELISA showing the TNF $\alpha$ -binding capabilities of the secreted

552 monovalent nanobody VHH#2B (Nb1) upon NO induction, obtained from EcN.

553

554

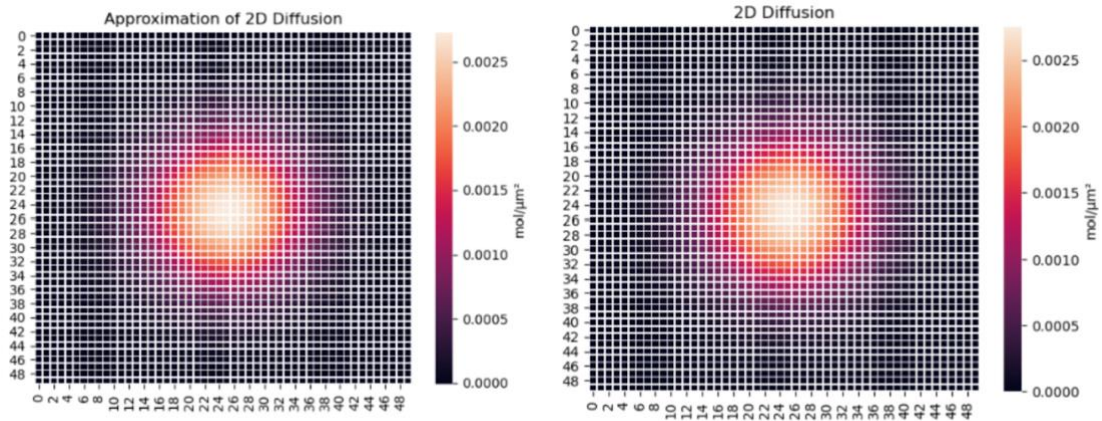

555

556 **5.17 Supplementary figure S17. Visual comparison between diffusion models**

557 Diffusion model used in the final model (left) next to diffusion by the more accurate Crank-

558 Nicolson scheme paired with the Runge-Kutta scheme.

559

## 560 6. References

- 561 (1) Davarinejad, H. Quantifications of Western Blots with ImageJ. *University of York* **2015**.  
562 (2) Ruano-Gallego, D.; Fraile, S.; Gutierrez, C.; Fernández, L. Á. Screening and Purification  
563 of Nanobodies from *E. Coli* Culture Supernatants Using the Hemolysin Secretion  
564 System. *Microb Cell Fact* **2019**, *18* (1), 47. <https://doi.org/10.1186/s12934-019-1094-0>.  
565 (3) Zimmermann, I.; Egloff, P.; Hutter, C. A.; Arnold, F. M.; Stohler, P.; Bocquet, N.; Hug, M.  
566 N.; Huber, S.; Siegrist, M.; Hetemann, L.; Gera, J.; Gmür, S.; Spies, P.; Gygax, D.;  
567 Geertsma, E. R.; Dawson, R. J.; Seeger, M. A. Synthetic Single Domain Antibodies for the  
568 Conformational Trapping of Membrane Proteins. *Elife* **2018**, *7*.  
569 <https://doi.org/10.7554/eLife.34317>.  
570 (4) Chen, X. J.; Wang, B.; Thompson, I. P.; Huang, W. E. Rational Design and Characterization  
571 of Nitric Oxide Biosensors in *E. Coli* Nissle 1917 and Mini SimCells. *ACS Synth Biol* **2021**,  
572 *10* (10), 2566–2578. <https://doi.org/10.1021/acssynbio.1c00223>.  
573 (5) Silence, K.; Lauwereys, M.; De Haard, H. Single Domain Antibodies Directed against  
574 Tumour Necrosis Factor-Alpha and Uses Therefor. US20090022721A1, 2003.  
575 (6) Sender, R.; Fuchs, S.; Milo, R. Revised Estimates for the Number of Human and Bacteria  
576 Cells in the Body. *PLoS Biol* **2016**, *14* (8), 1–14.  
577 <https://doi.org/10.1371/journal.pbio.1002533>.  
578 (7) Sender, R.; Fuchs, S.; Milo, R. Revised Estimates for the Number of Human and Bacteria  
579 Cells in the Body. *PLoS Biol* **2016**, *14* (8), e1002533.  
580 <https://doi.org/10.1371/journal.pbio.1002533>.  
581 (8) McCallum, G.; Tropini, C. The Gut Microbiota and Its Biogeography. *Nat Rev Microbiol*  
582 **2023**. <https://doi.org/10.1038/s41579-023-00969-0>.  
583 (9) Avdagić, N.; Začiragić, A.; Babić, N.; Hukić, M.; Šeremet, M.; Lepara, O.; Nakaš-Ićindić,  
584 E. Nitric Oxide as a Potential Biomarker in Inflammatory Bowel Disease. *Bosn J Basic*  
585 *Med Sci* **2013**, *13* (1), 5. <https://doi.org/10.17305/bjbms.2013.2402>.  
586 (10) Lacruz-Guzmán, D.; Torres-Moreno, D.; Pedrero, F.; Romero-Cara, P.; García-Tercero, I.;  
587 Trujillo-Santos, J.; Conesa-Zamora, P. Influence of Polymorphisms and TNF and IL1 $\beta$   
588 Serum Concentration on the Infliximab Response in Crohn's Disease and Ulcerative  
589 Colitis. *Eur J Clin Pharmacol* **2013**, *69* (3), 431–438. [https://doi.org/10.1007/s00228-](https://doi.org/10.1007/s00228-012-1389-0)  
590 [012-1389-0](https://doi.org/10.1007/s00228-012-1389-0).  
591 (11) Iwaki, T.; Hara, K.; Umemura, K. Nanobody Production Can Be Simplified by Direct  
592 Secretion from *Escherichia Coli*. *Protein Expr Purif* **2020**, *170*, 105607.  
593 <https://doi.org/10.1016/j.pep.2020.105607>.  
594 (12) Malinski, T.; Taha, Z.; Grunfeld, S.; Patton, S.; Kapturczak, M.; Tomboulian, P. Diffusion  
595 of Nitric Oxide in the Aorta Wall Monitored in Situ by Porphyrinic Microsensors.  
596 *Biochem Biophys Res Commun* **1993**, *193* (3), 1076–1082.  
597 <https://doi.org/10.1006/bbrc.1993.1735>.  
598 (13) Kalwarczyk, T.; Tabaka, M.; Holyst, R. Biologistics—Diffusion Coefficients for Complete  
599 Proteome of *Escherichia Coli*. *Bioinformatics* **2012**, *28* (22), 2971–2978.  
600 <https://doi.org/10.1093/bioinformatics/bts537>.  
601 (14) Pedersen, M. E.; Haegbaert, R. M. S.; Østergaard, J.; Jensen, H. Size-Based  
602 Characterization of Adalimumab and TNF- $\alpha$  Interactions Using Flow Induced Dispersion  
603 Analysis: Assessment of Avidity-Stabilized Multiple Bound Species. *Sci Rep* **2021**, *11* (1),  
604 4754. <https://doi.org/10.1038/s41598-021-84113-z>.

- 605 (15) Ackaert, C.; Smiejkowska, N.; Xavier, C.; Sterckx, Y. G. J.; Denies, S.; Stijlemans, B.; Elkrim,  
606 Y.; Devoogdt, N.; Caveliers, V.; Lahoutte, T.; Muyldermans, S.; Breckpot, K.; Keyaerts, M.  
607 Immunogenicity Risk Profile of Nanobodies. *Front Immunol* **2021**, *12*.  
608 <https://doi.org/10.3389/fimmu.2021.632687>.
- 609 (16) Jovčevska, I.; Muyldermans, S. The Therapeutic Potential of Nanobodies. *BioDrugs*  
610 **2020**, *34* (1), 11–26. <https://doi.org/10.1007/s40259-019-00392-z>.
- 611 (17) Thomas, D. D.; Liu, X.; Kantrow, S. P.; Lancaster, J. R. The Biological Lifetime of Nitric  
612 Oxide: Implications for the Perivascular Dynamics of NO and O<sub>2</sub>. *Proceedings of the*  
613 *National Academy of Sciences* **2001**, *98* (1), 355–360.  
614 <https://doi.org/10.1073/pnas.98.1.355>.
- 615 (18) Tijink, B. M.; Laeremans, T.; Budde, M.; Walsum, M. S.; Dreier, T.; de Haard, H. J.;  
616 Leemans, C. R.; van Dongen, G. A. M. S. Improved Tumor Targeting of Anti–Epidermal  
617 Growth Factor Receptor Nanobodies through Albumin Binding: Taking Advantage of  
618 Modular Nanobody Technology. *Mol Cancer Ther* **2008**, *7* (8), 2288–2297.  
619 <https://doi.org/10.1158/1535-7163.MCT-07-2384>.
- 620 (19) Zahn, G.; Greischel, A. Pharmacokinetics of Tumor Necrosis Factor Alpha after  
621 Intravenous Administration in Rats. Dose Dependence and Influence of Tumor Necrosis  
622 Factor Beta. *Arzneimittelforschung* **1989**, *39* (9), 1180–1182.  
623
